- channel block by acetylcholine during neuromuscular transmission in zebra fish. *J Neurosci* 2000; 20:140–8
16. Drapeau P, Legendre P: Neuromuscular transmission on the rebound. *Receptors Channels* 2001; 7:491–6
  17. Caldwell JE: Reversal of residual neuromuscular block with neostigmine at one to four hours after a single intubating dose of vecuronium. *Anesth Analg* 1995; 80:1168–74
  18. Goldhill DR, Wainwright AP, Stuart CS, Flynn PJ: Neostigmine after spontaneous recovery from neuromuscular blockade. *Anaesthesia* 1989; 44:293–9
  19. Kopman AF, Chin W, Moe J, Malik R: The effect of nitrous oxide on the dose-response relationship of rocuronium. *Anesth Analg* 2005; 100:1343–7
  20. Illman H, Heikki A, Olkkola K: Quantitation of the effect of nitrous oxide on rocuronium infusion requirements using closed-loop feedback control. *ANESTHESIOLOGY* 2008; 108: 388–91
  21. Naguib M, Kopman AF, Lien CA, Hunter JM, Lopez A, Brull SJ: A survey of current neuromuscular practice in the United States and Europe. *Anesth Analg* (in press)

## ANESTHESIOLOGY REFLECTIONS

### Laënnec's 1819 Stethoscope

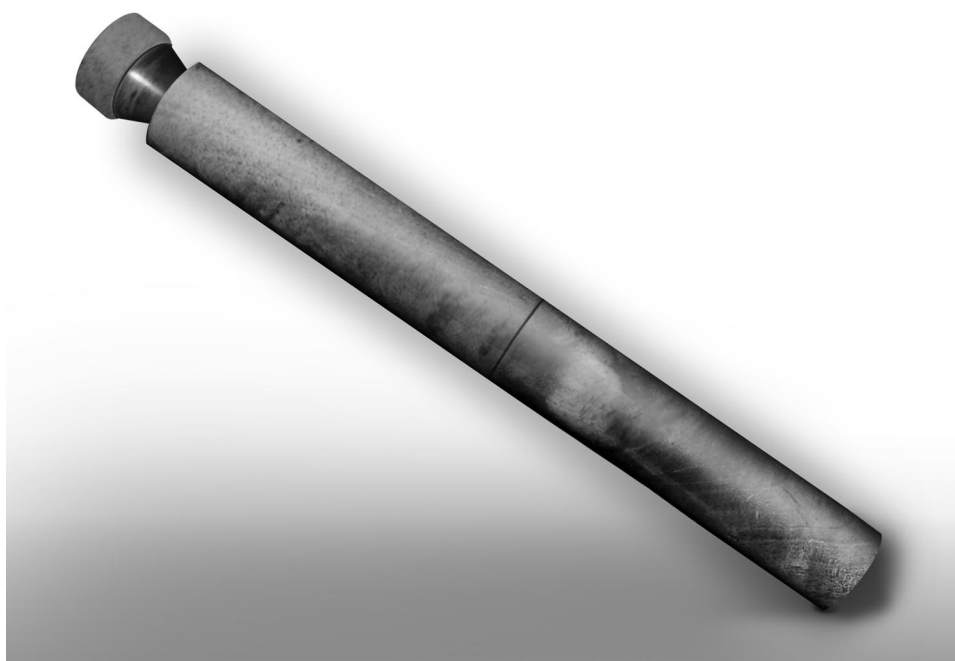

An asthmatic “consumptive” with a keen sense of musical pitch, French physician René Théophile Hyacinthe Laënnec (1781–1826) enjoyed watching children play near the Louvre as they listened to the scratching of pins from the opposite end of a long stick. To think that such play would later inspire Laënnec (by 1816) to invent the stethoscope! Both a flautist and a woodturner, Laënnec soon found himself turning walnut-wood cylinders into shorter, wider versions of flutes *sans* finger holes—stethoscopes. Finally, physicians could abandon direct “ear-on-chest” auscultation in favor of the stethoscope, an innovation which preserved (particularly female) patients’ modesty and physicians’ professional distance. In 1819 Laënnec handcrafted a stethoscope (see above, courtesy of the Wood Library-Museum) for a Strasbourg colleague. That Laënnec creation was acquired by telephone auction in 1991 by a quick-dialing curator. (Copyright © the American Society of Anesthesiologists, Inc. This image appears in color in the *Anesthesiology Reflections* online collection available at [www.anesthesiology.org](http://www.anesthesiology.org).)

George S. Bause, M.D., M.P.H., Honorary Curator, ASA’s Wood Library-Museum of Anesthesiology, Park Ridge, Illinois, and Clinical Associate Professor, Case Western Reserve University, Cleveland, Ohio. [UJYC@aol.com](mailto:UJYC@aol.com).
